# Supplementary material for: Culture-Independent PCR Detection and Differentiation of Mycobacteria spp. in Antemortem Respiratory Samples from African Elephants (Loxodonta africana) and Rhinoceros (Ceratotherium simum, Diceros bicornis) in South Africa
Source: Preprints.org preprint supplement (doi:10.20944/preprints202205.0403.v1), 2022-05-30
Supplement: Supplementary file 1 [file supplementary]

## Sheet: Sheet1
Species	Sample type	Xpert MTB/RIF Ultra	ku Mycobacteria spp. PCR (600bp)	rpoB Mycobacteria spp. PCR (740bp)	Hain CMdirect V1.0 LPA	MGIT+TiKa (rpoB+hsp65 PCR)	ESAT-6 PCR	CFP-10 PCR
White Rhino	BALF	MTB NOT DETECTED	Negative	Negative	Negative	Negative	Negative	Negative
White Rhino	BALF	MTB NOT DETECTED	Negative	Negative	Negative	Negative	Negative	Negative
White Rhino	BALF	MTB NOT DETECTED	Negative	Negative	Negative	Negative	Negative	Negative
White Rhino	BALF	MTB NOT DETECTED	Negative	Negative	Negative	Negative	Negative	Negative
White Rhino	BALF	MTB NOT DETECTED	Negative	Negative	Negative	Negative	Negative	Negative
White Rhino	BALF	MTB NOT DETECTED	Negative	Negative	Negative	Negative	Negative	Negative
White Rhino	BALF	MTB NOT DETECTED	Negative	Negative	Negative	Negative	Negative	Negative
Black Rhino	BALF	MTB NOT DETECTED	Negative	Negative	Negative	Negative	Negative	Negative
White Rhino	BALF	MTB NOT DETECTED	Negative	Negative	Negative	Negative	Negative	Negative
White Rhino	BALF	MTB NOT DETECTED	Negative	Negative	Negative	Negative	Negative	Negative
White Rhino	BALF	MTB NOT DETECTED	Negative	Negative	Negative	Negative	Negative	Negative
White Rhino	BALF	MTB NOT DETECTED	Negative	Negative	Negative	Negative	Negative	Negative
White Rhino	BALF	MTB NOT DETECTED	Negative	Negative	Negative	Negative	Negative	Negative
White Rhino	BALF	MTB NOT DETECTED	Negative	Negative	Negative	Negative	Negative	Negative
White Rhino	BALF	MTB NOT DETECTED	Negative	Negative	Negative	Negative	Negative	Negative
White Rhino	BALF	MTB NOT DETECTED	Negative	Negative	Negative	Negative	Negative	Negative
White Rhino	BALF	MTB NOT DETECTED	Negative	Negative	Negative	Negative	Negative	Negative
White Rhino	BALF	MTB NOT DETECTED	Negative	Negative	Negative	Negative	Negative	Negative
White Rhino	BALF	MTB NOT DETECTED	Negative	Negative	Negative	Negative	Negative	Negative
White Rhino	BALF	MTB NOT DETECTED	Negative	Negative	Negative	Negative	Negative	Negative
Black Rhino	BALF	MTB NOT DETECTED	Negative	Negative	Negative	Negative	Negative	Negative
Elephant	BALF	MTB NOT DETECTED	mixed NTMS - M. Szulgai	M. Szulgai	M. Szulgai	Negative	Negative	Negative
Elephant	BALF	MTB NOT DETECTED	M. fortuitum group	M. fortriutum group	M. fortriutum group	Negative	Negative	Negative
Elephant	BALF	MTB NOT DETECTED	M. fortuitum group	M. interjectum	M. fortriutum group	Negative	Negative	Negative
Elephant	BALF	MTB NOT DETECTED	M. fortuitum group	M. fortriutum group	M. fortriutum group	Negative	Negative	Negative
Elephant	BALF	MTB TRACE DETECTED	M. africanum	M. africanum	MTBC/M. fortiutum	Negative	Positive	Positive
Elephant	BALF	MTB NOT DETECTED	Negative	Negative	M. fortriutum group	Negative	Negative	Negative
Elephant	BALF	MTB NOT DETECTED	Negative	Negative	NEGATIVE	Negative	Negative	Negative
Elephant	BALF	MTB TRACE DETECTED	M. bovis	M. bovis	MTBC/mixed infection	Negative	Positive	Positive
Elephant	BALF	MTB NOT DETECTED	M. avium complex	M.avium complex	M. fortriutum group	Negative	Negative	Negative
Elephant	BALF	MTB NOT DETECTED	Negative	M. interjectum	M. fortriutum group/ M. interjectum/ M. Szulgai	Negative	Positive	Positive
Elephant	BALF	MTB NOT DETECTED	M. intracellulare	M. intracellulare	M. fortuitum group/ M. interjectum/ M. Szulgai/ M. kansasii	Negative	Positive	Positive
Elephant	BALF	MTB TRACE DETECTED	M. avium complex	Mycobacteria spp.	MTBC/mixed NTM infection	Negative	Positive	Positive
Elephant	BALF	MTB NOT DETECTED	mixed NTMs	mixed NTMs	mixed NTM	Negative	Negative	Negative
Elephant	TW	MTB NOT DETECTED	M. fortuitum group	Negative	M. fortriutum group	Negative	Negative	Negative
Elephant	TW	MTB NOT DETECTED	mixed NTMs - M. avium subsp. Paratuberculosis	M. avium comlpex	M. fortriutum group	Negative	Negative	Negative
Elephant	TW	MTB TRACE DETECTED	M. orygis	M. orygis	MTBC/mixed NTM infection	Negative	Positive	Positive
Elephant	TW	MTB NOT DETECTED	Negative	M. interjectum	M. interjectum/ M. fortiutum group	Negative	Negative	Negative
Elephant	TW	MTB NOT DETECTED	M. fortuitum group	M. interjectum	M. interjectum/ M. fortiutum group	Negative	Negative	Negative
Elephant	TW	MTB NOT DETECTED	M. fortuitum	M. fortriutum	M. fortriutum group	Negative	Negative	Negative
Elephant	BALF	MTB NOT DETECTED	mixed NTMs- M. avium complex	M. interjectum	M. avium/ M. interjectum	Negative	Positive	Positive
Elephant	BALF	MTB NOT DETECTED	Negative	Negative	Negative	Negative	Negative	Negative
Elephant	TW	MTB NOT DETECTED	Negative	Negative	Negative	Negative	Negative	Negative
Elephant	TW	MTB NOT DETECTED	Negative	Negative	Negative	Negative	Negative	Negative
Elephant	TW	MTB NOT DETECTED	Negative	Negative	Negative	Negative	Negative	Negative
Elephant	TW	MTB NOT DETECTED	Negative	Negative	Negative	Negative	Negative	Negative
